# Supplementary material for: Dogs Can Be Successfully Trained to Alert to Hypoglycemia Samples from Patients with Type 1 Diabetes
Source: PubMed Central journal article supplement — Diabetes Ther. 2015 Oct 6;6(4):509–17. doi: 10.1007/s13300-015-0135-x (PMC4674474; doi:10.1007/s13300-015-0135-x), 2015-10-06
Supplement: 13300_2015_135_MOESM1_ESM.pdf [file 13300_2015_135_MOESM1_ESM.pdf]

## *Why carry out this study?*

- Case reports and anecdotal evidence suggest that Diabetes Alert Dogs (DADs) are effective in helping patients with type 1 diabetes (T1D) prevent serious consequences of hypoglycemia (Hypo) by providing early alert. However, there has not been rigorous scientific study of DADs.
- We conducted this study to test the sensitivity and specificity of DADs to alert to Hypo samples from patients with T1D.

## *What was learned from the study?*

- DADs at the end of training exhibited high levels of sensitivity and specificity in alerting to Hypo samples.
- Dogs can be trained to alert to Hypo samples from patients with T1D. Further study is needed to learn about reinforcement of training and outcomes in the home environment.

This summary slide represents the opinions of the authors. Article processing charges for this study were funded by Eli Lilly. For a full list of acknowledgments and disclosures for all authors of this article, please see the full text online. © The Author(s) 2015. Creative Commons Attribution Noncommercial License (CC BY-NC).
